# Supplementary material for: Human striatal organoids derived from pluripotent stem cells recapitulate striatal development and compartments
Source: PubMed Central journal article supplement (PMC9714809; doi:10.1371/journal.pbio.3001868), 2022-11-17
Supplement: pbio.3001868.s014.pdf [file pbio.3001868.s014.pdf]

Supplementary Table 1: Antibodies for immunostaining with their purpose.

| <b>Name</b>                                   | <b>Purpose</b>                                |
|-----------------------------------------------|-----------------------------------------------|
| <b>General markers in human brain</b>         |                                               |
| SOX2                                          | Neural progenitor marker                      |
| Ki67                                          | Proliferative cells marker                    |
| NEUN                                          | Mature neurons marker                         |
| DCX                                           | Immature neuron marker                        |
| TUJ1                                          | Neuron marker                                 |
| MAP2                                          | Mature neurons marker                         |
| Bassoon                                       | Pre-synaptic proteins marker                  |
| PSD95                                         | Post-synaptic proteins marker                 |
| GFAP                                          | Astrocytes marker                             |
| MBP                                           | Myelin essential protein                      |
| PAX6                                          | Neuroectoderm markers                         |
| SOX1                                          | Neuroectoderm markers                         |
| OTX2                                          | Forebrain marker                              |
| FOXG1                                         | Forebrain marker                              |
| <b>Region-specific markers in human brain</b> |                                               |
| <b>Cortex</b>                                 |                                               |
| PAX6                                          | Dorsal forebrain progenitor marker            |
| TBR1                                          | One of cortical layer neuron markers          |
| CTIP2                                         | One of cortical layer neuron markers          |
| SATB2                                         | One of cortical layer neuron markers          |
| <b>LGE</b>                                    |                                               |
| GSH2                                          | LGE progenitor cells marker                   |
| MASH1                                         | LGE Intermediate progenitor cells marker      |
| DLX2                                          | Ventral forebrain marker                      |
| GABA                                          | GABAergic neuron marker                       |
| MEIS1/2                                       | Striatal MSN marker                           |
| CTIP2                                         | Striatal MSN marker                           |
| DARPP32                                       | Striatal MSN marker/Striosome-enriched marker |
| FOXP2                                         | Striosome-enriched marker                     |
| CALB2                                         | Striosome-enriched marker                     |
| MOR1                                          | Striosome-enriched marker                     |
| CALB1                                         | Matrix-enriched marker                        |
| <b>MGE</b>                                    |                                               |
| NKX2.1                                        | MGE marker                                    |
| <b>Mid-brain</b>                              |                                               |
| FOXA2                                         | Midbrain marker                               |
| TH                                            | Dopaminergic neurons marker                   |
