# Supplementary material for: Human striatal organoids derived from pluripotent stem cells recapitulate striatal development and compartments
Source: PubMed Central journal article supplement (PMC9714809; doi:10.1371/journal.pbio.3001868), 2022-11-17
Supplement: pbio.3001868.s015.pdf [file pbio.3001868.s015.pdf]

**Supplementary Table 2:**

Comparison of protocols for striatal neuron differentiation from human pluripotent stem cells

|                                                | Ma et al.,[1]<br>2012   | Carri et<br>al.,[2]<br>2013 | Arber et<br>al.,[3]<br>2015 | hStrS Miura et<br>al.,[4]<br>2020                        | hStrO Chen et al                                                |
|------------------------------------------------|-------------------------|-----------------------------|-----------------------------|----------------------------------------------------------|-----------------------------------------------------------------|
| Type of culture                                | 2D                      | 2D                          | 2D                          | 3D                                                       | 3D                                                              |
| Patterning                                     | SHH or<br>Purmorphamine | SHHC-25II<br>DKK1           | Activin A                   | Activin A<br>IWP-2<br>SR11237                            | Purmorphamine                                                   |
| Cell diversity                                 | Progenitors<br>Neurons  | Progenitors<br>Neurons      | Progenitors<br>Neurons      | Progenitors<br>Neurons<br>Astrocytes<br>Oligodendrocytes | Progenitors<br>Neurons<br>Astrocytes<br>Oligodendrocytes        |
| Proportion of<br>CTIP2+ cells                  | Not shown               | 60%                         | 50%                         | 50%                                                      | 20%                                                             |
| Proportion of<br>DARPP32+<br>neurons           | 80%                     | 20%<br>(of MAP2+<br>cells)  | 20-50%                      | 30%<br>(of NeuN+ cells)                                  | 70% (of NeuN+<br>cells)                                         |
| Proportion of<br>CTIP2+<br>DARPP32+<br>neurons | Not shown               | Not shown                   | Not shown                   | Not shown                                                | 18.27±10.27%                                                    |
| Spatial<br>cytoarchitecture                    | -                       | -                           | -                           | Not shown                                                | VZ, SVZ, and<br>MZ-like zones<br>Compartment-<br>like structure |

**Reference**

1. Ma, L., et al., *Human embryonic stem cell-derived GABA neurons correct locomotion deficits in quinolinic acid-lesioned mice*. Cell Stem Cell, 2012. **10**(4): p. 455-464.
2. Delli Carri, A., et al., *Developmentally coordinated extrinsic signals drive human pluripotent stem cell differentiation toward authentic DARPP-32+ medium-sized spiny neurons*. Development (Cambridge, England), 2013. **140**(2): p. 301-312.
3. Arber, C., et al., *Activin A directs striatal projection neuron differentiation of human pluripotent stem cells*. Development (Cambridge, England), 2015. **142**(7): p. 1375-1386.
4. Miura, Y., et al., *Generation of human striatal organoids and cortico-striatal assembloids from human pluripotent stem cells*. Nature Biotechnology, 2020. **38**(12): p. 1421-1430.
